# Supplementary material for: Use of Large-Scale Genomics to Identify the Role of Animals and Foods as Potential Sources of Extraintestinal Pathogenic Escherichia coli That Cause Human Illness
Source: MDPI journal article supplement (doi:10.3390/foods11131975), 2022-07-03
Supplement: s1 [file s1]

**Supplemental Table S1. Virulence Group Definitions**

| Virulence Group | Virulence Genes                                                                                                                                                                                                   |
|-----------------|-------------------------------------------------------------------------------------------------------------------------------------------------------------------------------------------------------------------|
| 39              | <i>espX1, fdeC, fyuA, iroE, iroN, irp2, iss, iucA, iucC, iutA, lpfA, mchF, ompT, papA, papC, sitA, traT, ybtP, ybtQ, hlyF, gad, cvaC, hra, etsC, papH</i>                                                         |
| 10              | <i>espX1, fdeC, fyuA, iroE, iroN, irp2, iss, iucA, iucC, iutA, lpfA, mchF, ompT, sitA, traT, ybtP, ybtQ, hlyF, gad, cvaC, etsC</i>                                                                                |
| 15              | <i>chuA, fdeC, fyuA, iroE, iroN, irp2, iss, iucA, iucC, iutA, lpfA, ompT, sitA, sslE, traT, ybtP, ybtQ, vat, hlyF, etsC, ireA</i>                                                                                 |
| 34              | <i>espX1, fdeC, fyuA, iroE, iroN, irp2, iss, iucA, iucC, iutA, lpfA, mchF, ompT, papC, papF, papG, sitA, traT, ybtP, ybtQ, hlyF, papE, gad, cvaC, etsC, tsh</i>                                                   |
| 2               | <i>espX1, fdeC, iroE, iroN, iss, iucA, iucC, iutA, lpfA, mchF, ompT, papA, papC, papF, papG, sitA, traT, hlyF, papE, gad, etsC</i>                                                                                |
| 21              | <i>cib, espX1, fdeC, iroE, iroN, iss, iucA, iucC, iutA, lpfA, mchF, ompT, sitA, traT, hlyF, gad, cvaC, etsC, tsh</i>                                                                                              |
| 20              | <i>espX1, fdeC, iroE, iroN, iss, iucA, iucC, iutA, lpfA, mchF, ompT, sitA, traT, hlyF, gad, cvaC, etsC</i>                                                                                                        |
| 6               | <i>cma, espX1, fdeC, iroE, iroN, iss, iucA, iucC, iutA, lpfA, mchF, ompT, sitA, traT, hlyF, gad, cvaC, etsC, tsh, cba</i>                                                                                         |
| 29              | <i>cma, espX1, fdeC, iroE, iroN, iss, lpfA, ompT, sitA, traT, hlyF, gad, cvaC</i>                                                                                                                                 |
| 27              | <i>fdeC, iroE, iroN, iss, mchF, ompT, traT, hlyF, gad, astA, etsC</i>                                                                                                                                             |
| 26              | <i>chuA, fdeC, fyuA, iha, irp2, iss, iucA, iucB, iucC, iucD, iutA, ompT, papA, sat, sitA, traT, usp, ybtP, ybtQ, yfcV, kpsE, gad, kpsM</i>                                                                        |
| 12              | <i>chuA, fdeC, fyuA, iha, irp2, iss, iucA, iucC, iutA, ompT, papA, sat, sitA, traT, usp, ybtP, ybtQ, yfcV, kpsE, kpsM</i>                                                                                         |
| 7               | <i>chuA, eilA, espX1, fdeC, fyuA, iha, irp2, iucA, iucC, iutA, lpfA, ompT, papA, papC, papF, papG, sat, sitA, traT, ybtP, ybtQ, kpsE, gad, kpsM, papH, air</i>                                                    |
| 33              | <i>afaA, afaB, afaC, afaD, chuA, fdeC, fyuA, iha, irp2, iss, iucA, iucC, iutA, ompT, papA, sat, sitA, traT, usp, ybtP, ybtQ, yfcV, nfaE, kpsE, gad, kpsM</i>                                                      |
| 30              | <i>chuA, fdeC, fyuA, iroE, iroN, irp2, iss, iucA, iucC, iutA, mchF, ompT, sitA, sslE, traT, usp, ybtP, ybtQ, yfcV, vat, hlyF, kpsE, cvaC, etsC, kpsM, ibeA, tsh</i>                                               |
| 8               | <i>chuA, fdeC, fyuA, iroE, iroN, irp2, iss, ompT, sitA, sslE, traT, usp, ybtP, ybtQ, yfcV, vat, hlyF, kpsE, gad, ibeA</i>                                                                                         |
| 40              | <i>chuA, fdeC, fyuA, iroE, iroN, irp2, iss, iucA, iucC, iutA, mchF, ompT, papA, papC, papF, papG, sitA, sslE, traT, usp, ybtP, ybtQ, yfcV, hlyF, kpsE, papE, gad, cvaC, etsC, kpsM</i>                            |
| 32              | <i>chuA, fdeC, fyuA, iroE, iroN, irp2, iss, mchB, mchF, ompT, papA, papC, papF, papG, sitA, usp, ybtP, ybtQ, yfcV, mchC, vat, mcmA, gad, cea, foci, hlyA.alpha, hra, sfaF, focG, cnfI, papH, focCsfA</i>          |
| 37              | <i>chuA, fdeC, fyuA, iroE, iroN, irp2, iss, mchB, mchF, ompT, papA, papC, papF, papG, sitA, usp, ybtP, ybtQ, yfcV, mchC, vat, mcmA, kpsE, gad, cea, hlyA.alpha, hra, sfaD, sfaF, kpsM, cnfI, clbB, focC, tcpC</i> |
| 38              | <i>chuA, fdeC, fyuA, iroE, iroN, irp2, iss, lpfA, mchB, mchF, ompT, sitA, usp, ybtP, ybtQ, yfcV, mchC, vat, mcmA, gad, cea, foci, sfaF, focG, ibeA</i>                                                            |
| 35              | <i>chuA, fdeC, fyuA, iroE, iroN, irp2, iss, ompT, papA, papC, papF, papG, sitA, sslE, traT, usp, ybtP, ybtQ, yfcV, vat, kpsE, gad, hlyA.alpha, hra, sfaD, sfaF, kpsM, cnfI, clbB, sfaS</i>                        |
| 16              | <i>chuA, fdeC, fyuA, irp2, iss, ompT, sitA, sslE, traT, usp, ybtP, ybtQ, yfcV, vat, kpsE, gad, kpsM</i>                                                                                                           |
| 36              | <i>chuA, eilA, espX1, fdeC, kpsE, gad, kpsM, air</i>                                                                                                                                                              |
| 4               | <i>chuA, eilA, espX1, fdeC, iss, lpfA1, gad, air</i>                                                                                                                                                              |
| 18              | <i>chuA, cma, eilA, espX1, fdeC, iroE, iroN, iss, ompT, sitA, traT, hlyF, gad, cvaC, air</i>                                                                                                                      |
| 28              | <i>cma, espX1, fdeC, iha, iss, iucA, iucC, iutA, ompT, sitA, traT, kpsE, gad, astA, hra, kpsM</i>                                                                                                                 |
| 11              | <i>fdeC, iss, lpfA, ompT, traT, cia, gad, hlyA.alpha</i>                                                                                                                                                          |
| 23              | <i>espX1, fdeC, ompT, traT, gad, astA</i>                                                                                                                                                                         |
| 1               | <i>espX1, fdeC, iss, lpfA, ompT, traT, gad</i>                                                                                                                                                                    |
| 22              | <i>espX1, fdeC, iss, lpfA, ompT, gad</i>                                                                                                                                                                          |
| 9               | <i>espX1, fdeC, lpfA, gad</i>                                                                                                                                                                                     |
| 25              | <i>fdeC, gad</i>                                                                                                                                                                                                  |
| 24              | <i>espX1, gad</i>                                                                                                                                                                                                 |
| 5               | <i>chuA, eilA, espX1, fdeC, iss, lpfA, lpfA1, gad, astA, capU, staI</i>                                                                                                                                           |

- 13** *chuA, eilA, espX1, fdeC, fyuA, irp2, iucA, iucC, iutA, sitA, traT, ybtP, ybtQ, kpsE, gad, hra, kpsM, air*
- 14** *chuA, eilA, espX1, fdeC, fyuA, irp2, ybtP, ybtQ, kpsE, gad, kpsM, air*
- 17** *afaA, afaB, afaC, afaD, chuA, eilA, espX1, fdeC, fyuA, irp2, iss, ybtP, ybtQ, nfaE, kpsE, gad, kpsM, air*
- 3** *espX1, fdeC, fyuA, iha, irp2, iucA, iucC, iutA, traT, ybtP, ybtQ, gad*
- 19** *espX1, fdeC, fyuA, irp2, ybtP, ybtQ, gad*
- 31** *afaA, afaB, afaC, afaD, fdeC, iss, iucA, iucC, iutA, lpfA, ompT, traT, gad, afaE8, bmaE*

**Supplemental Table S2. Isolation Source Composition of Virulence Groups**

| VG | Human | Cattle | Chicken | Turkey | Swine | Untyped<br>Meat<br>Sample | Companion<br>Animal | Isolates | Relative<br>Risk<br>Group |
|----|-------|--------|---------|--------|-------|---------------------------|---------------------|----------|---------------------------|
| 39 | 9.3   | 14.0   | 0.0     | 16.3   | 44.2  | 0.0                       | 16.3                | 43       | L                         |
| 10 | 7.5   | 7.1    | 14.8    | 39.3   | 25.8  | 0.5                       | 5.0                 | 438      | L                         |
| 15 | 4.6   | 1.7    | 46.2    | 32.9   | 12.1  | 1.7                       | 0.6                 | 173      | L                         |
| 34 | 8.3   | 1.4    | 9.7     | 56.9   | 23.6  | 0.0                       | 0.0                 | 72       | L                         |
| 2  | 4.7   | 1.9    | 20.6    | 55.1   | 15.9  | 1.9                       | 0.0                 | 107      | L                         |
| 21 | 4.3   | 0.0    | 56.0    | 29.3   | 7.8   | 0.0                       | 2.6                 | 116      | L                         |
| 20 | 5.0   | 1.5    | 41.0    | 23.5   | 27.5  | 1.0                       | 0.5                 | 200      | L                         |
| 6  | 4.1   | 3.1    | 19.0    | 60.5   | 11.8  | 1.0                       | 0.5                 | 195      | L                         |
| 29 | 10.9  | 2.8    | 31.8    | 37.9   | 14.2  | 0.5                       | 1.9                 | 211      | L                         |
| 27 | 2.1   | 2.1    | 1.4     | 93.6   | 0.7   | 0.0                       | 0.0                 | 140      | L                         |
| 26 | 100.0 | 0.0    | 0.0     | 0.0    | 0.0   | 0.0                       | 0.0                 | 32       | H                         |
| 12 | 94.3  | 0.0    | 0.0     | 0.2    | 0.0   | 0.0                       | 5.5                 | 472      | H                         |
| 7  | 95.4  | 0.0    | 0.0     | 0.0    | 0.0   | 0.0                       | 4.6                 | 130      | H                         |
| 33 | 99.1  | 0.0    | 0.0     | 0.0    | 0.0   | 0.0                       | 0.9                 | 113      | H                         |
| 30 | 9.3   | 6.6    | 18.1    | 61.5   | 2.7   | 0.5                       | 1.1                 | 182      | L                         |
| 8  | 22.3  | 4.3    | 11.5    | 44.6   | 1.4   | 0.0                       | 15.8                | 139      | L                         |
| 40 | 45.0  | 0.0    | 2.7     | 27.0   | 19.8  | 0.9                       | 4.5                 | 111      | M                         |
| 32 | 29.3  | 0.0    | 0.0     | 0.5    | 1.4   | 0.0                       | 68.9                | 222      | M                         |
| 37 | 40.8  | 0.0    | 0.0     | 0.6    | 2.4   | 0.0                       | 56.2                | 169      | M                         |
| 38 | 15.1  | 0.0    | 0.0     | 11.0   | 0.0   | 0.0                       | 74.0                | 73       | L                         |
| 35 | 68.9  | 0.0    | 0.0     | 0.0    | 1.0   | 0.0                       | 30.1                | 103      | H                         |
| 16 | 68.6  | 1.5    | 0.4     | 2.6    | 0.0   | 0.4                       | 26.6                | 274      | H                         |
| 36 | 52.9  | 16.9   | 2.2     | 8.8    | 6.6   | 0.0                       | 12.5                | 136      | H                         |
| 4  | 14.9  | 37.2   | 9.6     | 13.8   | 18.1  | 0.0                       | 6.4                 | 94       | L                         |
| 18 | 10.2  | 8.2    | 36.7    | 34.7   | 6.1   | 0.0                       | 4.1                 | 49       | L                         |
| 28 | 8.7   | 0.0    | 72.8    | 10.9   | 3.3   | 2.2                       | 2.2                 | 92       | L                         |
| 11 | 4.2   | 81.9   | 5.6     | 2.8    | 0.0   | 0.0                       | 5.6                 | 72       | L                         |
| 23 | 14.9  | 57.5   | 2.3     | 6.9    | 17.2  | 0.0                       | 1.1                 | 87       | L                         |
| 1  | 17.2  | 54.4   | 7.3     | 7.1    | 11.9  | 0.3                       | 1.8                 | 956      | L                         |
| 22 | 22.3  | 49.0   | 6.4     | 4.9    | 13.8  | 0.0                       | 3.6                 | 390      | L                         |
| 9  | 15.7  | 43.9   | 5.0     | 5.8    | 24.3  | 0.1                       | 5.3                 | 1026     | L                         |
| 25 | 10.7  | 40.7   | 3.7     | 6.1    | 32.5  | 0.0                       | 6.3                 | 459      | L                         |
| 24 | 16.3  | 28.3   | 11.3    | 6.3    | 37.5  | 0.4                       | 0.0                 | 240      | L                         |
| 5  | 92.1  | 7.9    | 0.0     | 0.0    | 0.0   | 0.0                       | 0.0                 | 76       | H                         |
| 13 | 50.0  | 0.0    | 36.8    | 5.3    | 2.6   | 2.6                       | 2.6                 | 38       | H                         |
| 14 | 68.8  | 0.7    | 5.6     | 8.3    | 1.4   | 0.0                       | 15.3                | 144      | H                         |
| 17 | 97.1  | 0.0    | 0.0     | 0.0    | 0.0   | 0.0                       | 2.9                 | 35       | H                         |
| 3  | 92.6  | 1.1    | 2.1     | 1.1    | 1.6   | 0.0                       | 1.6                 | 190      | H                         |
| 19 | 37.5  | 26.9   | 1.9     | 5.3    | 21.9  | 0.0                       | 6.6                 | 320      | M                         |
| 31 | 39.1  | 43.5   | 0.0     | 0.0    | 8.7   | 0.0                       | 8.7                 | 23       | M                         |

Values for isolation source presented as percentages, VG column header describes the Virulence Group and animal isolation sources are the combined results from all contributing organizations.

**Supplemental Table S3. Contributing Data Source Composition of Virulence Groups**

| <b>VG</b> | <b>CDC-<br/>PulseNet</b> | <b>non-<br/>PulseNet</b> | <b>FSIS<br/>NARMS</b> | <b>CVM<br/>NARMS</b> | <b>APHIS</b> | <b>Vet-LIRN</b> | <b>Isolates</b> | <b>Relative<br/>Risk<br/>Group</b> |
|-----------|--------------------------|--------------------------|-----------------------|----------------------|--------------|-----------------|-----------------|------------------------------------|
| <b>39</b> | 4.7                      | 4.7                      | 51.2                  | 18.6                 | 7.0          | 14.0            | 43              | L                                  |
| <b>10</b> | 3.4                      | 4.1                      | 44.7                  | 42.0                 | 0.9          | 4.8             | 438             | L                                  |
| <b>15</b> | 3.5                      | 1.2                      | 23.7                  | 68.2                 | 2.9          | 0.6             | 173             | L                                  |
| <b>34</b> | 1.4                      | 6.9                      | 48.6                  | 43.1                 | 0.0          | 0.0             | 72              | L                                  |
| <b>2</b>  | 0.9                      | 3.7                      | 30.8                  | 63.6                 | 0.9          | 0.0             | 107             | L                                  |
| <b>21</b> | 1.7                      | 2.6                      | 33.6                  | 58.6                 | 0.9          | 2.6             | 116             | L                                  |
| <b>20</b> | 2.5                      | 2.5                      | 34.0                  | 60.0                 | 0.5          | 0.5             | 200             | L                                  |
| <b>6</b>  | 3.1                      | 1.0                      | 33.3                  | 62.1                 | 0.0          | 0.5             | 195             | L                                  |
| <b>29</b> | 0.9                      | 10.0                     | 35.1                  | 52.1                 | 0.0          | 1.9             | 211             | L                                  |
| <b>27</b> | 2.1                      | 0.0                      | 45.7                  | 52.1                 | 0.0          | 0.0             | 140             | L                                  |
| <b>26</b> | 100.0                    | 0.0                      | 0.0                   | 0.0                  | 0.0          | 0.0             | 32              | H                                  |
| <b>12</b> | 14.6                     | 79.7                     | 0.2                   | 0.0                  | 0.4          | 5.1             | 472             | H                                  |
| <b>7</b>  | 38.5                     | 56.9                     | 0.0                   | 0.0                  | 0.0          | 4.6             | 130             | H                                  |
| <b>33</b> | 43.4                     | 55.8                     | 0.0                   | 0.0                  | 0.0          | 0.9             | 113             | H                                  |
| <b>30</b> | 3.3                      | 6.0                      | 13.7                  | 73.6                 | 2.2          | 1.1             | 182             | L                                  |
| <b>8</b>  | 10.1                     | 12.2                     | 5.8                   | 54.0                 | 4.3          | 13.7            | 139             | L                                  |
| <b>40</b> | 7.2                      | 37.8                     | 17.1                  | 31.5                 | 1.8          | 4.5             | 111             | M                                  |
| <b>32</b> | 7.2                      | 22.1                     | 0.0                   | 2.7                  | 4.1          | 64.0            | 222             | M                                  |
| <b>37</b> | 12.4                     | 28.4                     | 0.6                   | 2.4                  | 5.3          | 50.9            | 169             | M                                  |
| <b>38</b> | 9.6                      | 5.5                      | 0.0                   | 11.0                 | 0.0          | 74.0            | 73              | L                                  |
| <b>35</b> | 14.6                     | 54.4                     | 0.0                   | 1.0                  | 1.0          | 29.1            | 103             | H                                  |
| <b>16</b> | 19.3                     | 49.3                     | 1.5                   | 2.9                  | 0.4          | 26.6            | 274             | H                                  |
| <b>36</b> | 30.1                     | 22.8                     | 20.6                  | 13.2                 | 0.7          | 12.5            | 136             | H                                  |
| <b>4</b>  | 11.7                     | 3.2                      | 45.7                  | 33.0                 | 1.1          | 5.3             | 94              | L                                  |
| <b>18</b> | 2.0                      | 8.2                      | 36.7                  | 44.9                 | 4.1          | 4.1             | 49              | L                                  |
| <b>28</b> | 3.3                      | 5.4                      | 22.8                  | 66.3                 | 0.0          | 2.2             | 92              | L                                  |
| <b>11</b> | 2.8                      | 1.4                      | 72.2                  | 18.1                 | 0.0          | 5.6             | 72              | L                                  |
| <b>23</b> | 13.8                     | 1.1                      | 58.6                  | 24.1                 | 1.1          | 1.1             | 87              | L                                  |
| <b>1</b>  | 14.2                     | 2.9                      | 54.0                  | 27.1                 | 0.6          | 1.2             | 956             | L                                  |
| <b>22</b> | 19.2                     | 3.1                      | 50.3                  | 22.8                 | 1.5          | 3.1             | 390             | L                                  |
| <b>9</b>  | 9.9                      | 5.8                      | 40.8                  | 38.0                 | 1.0          | 4.5             | 1026            | L                                  |
| <b>25</b> | 8.9                      | 2.0                      | 60.6                  | 22.2                 | 1.5          | 4.8             | 459             | L                                  |
| <b>24</b> | 10.0                     | 6.3                      | 33.8                  | 49.6                 | 0.0          | 0.4             | 240             | L                                  |
| <b>5</b>  | 92.1                     | 0.0                      | 6.6                   | 1.3                  | 0.0          | 0.0             | 76              | H                                  |
| <b>13</b> | 21.1                     | 28.9                     | 13.2                  | 34.2                 | 0.0          | 2.6             | 38              | H                                  |
| <b>14</b> | 25.7                     | 43.1                     | 5.6                   | 10.4                 | 0.0          | 15.3            | 144             | H                                  |
| <b>17</b> | 34.3                     | 62.9                     | 0.0                   | 0.0                  | 0.0          | 2.9             | 35              | H                                  |
| <b>3</b>  | 81.6                     | 11.1                     | 3.2                   | 2.6                  | 0.0          | 1.6             | 190             | H                                  |
| <b>19</b> | 29.1                     | 8.8                      | 32.8                  | 22.2                 | 2.2          | 5.0             | 320             | M                                  |
| <b>31</b> | 21.7                     | 17.4                     | 47.8                  | 0.0                  | 4.3          | 8.7             | 23              | M                                  |

Values for contributing data source presented as percentages, VG column header describes the Virulence Group.

**Supplemental Table S4. Phylogenetic Group Composition of Virulence Groups**

| <b>VG</b> | <b>A</b> | <b>B1</b> | <b>B2</b> | <b>C</b> | <b>D</b> | <b>E</b> | <b>E or<br/>cladeI</b> | <b>F</b> | <b>G</b> | <b>Unknown</b> | <b>Relative<br/>Risk<br/>Group</b> |
|-----------|----------|-----------|-----------|----------|----------|----------|------------------------|----------|----------|----------------|------------------------------------|
| <b>39</b> | 16.3     | 20.9      | 7.0       | 55.8     | 0.0      | 0.0      | 0.0                    | 0.0      | 0.0      | 0.0            | L                                  |
| <b>10</b> | 5.0      | 64.6      | 1.4       | 12.3     | 12.6     | 0.2      | 0.0                    | 3.9      | 0.0      | 0.0            | L                                  |
| <b>15</b> | 0.0      | 0.0       | 4.0       | 0.0      | 0.0      | 0.0      | 0.0                    | 0.0      | 94.2     | 1.7            | L                                  |
| <b>34</b> | 6.9      | 27.8      | 5.6       | 31.9     | 11.1     | 0.0      | 0.0                    | 1.4      | 15.3     | 0.0            | L                                  |
| <b>2</b>  | 8.4      | 58.9      | 0.0       | 14.0     | 2.8      | 5.6      | 0.0                    | 8.4      | 1.9      | 0.0            | L                                  |
| <b>21</b> | 17.2     | 56.0      | 0.0       | 6.0      | 4.3      | 6.9      | 0.0                    | 6.0      | 3.4      | 0.0            | L                                  |
| <b>20</b> | 14.0     | 66.0      | 0.5       | 6.0      | 4.0      | 2.5      | 0.0                    | 1.5      | 3.0      | 2.5            | L                                  |
| <b>6</b>  | 16.9     | 64.6      | 0.0       | 7.7      | 6.7      | 2.6      | 0.0                    | 0.5      | 0.5      | 0.5            | L                                  |
| <b>29</b> | 29.4     | 61.1      | 0.0       | 6.2      | 0.5      | 0.5      | 0.0                    | 0.5      | 1.9      | 0.0            | L                                  |
| <b>27</b> | 81.4     | 16.4      | 0.0       | 0.0      | 0.0      | 2.1      | 0.0                    | 0.0      | 0.0      | 0.0            | L                                  |
| <b>26</b> | 0.0      | 0.0       | 100.0     | 0.0      | 0.0      | 0.0      | 0.0                    | 0.0      | 0.0      | 0.0            | H                                  |
| <b>12</b> | 0.4      | 0.0       | 99.2      | 0.0      | 0.4      | 0.0      | 0.0                    | 0.0      | 0.0      | 0.0            | H                                  |
| <b>7</b>  | 0.8      | 0.0       | 9.2       | 0.0      | 55.4     | 0.0      | 0.0                    | 18.5     | 16.2     | 0.0            | H                                  |
| <b>33</b> | 17.7     | 0.0       | 74.3      | 0.0      | 7.1      | 0.0      | 0.0                    | 0.9      | 0.0      | 0.0            | H                                  |
| <b>30</b> | 0.0      | 0.0       | 100.0     | 0.0      | 0.0      | 0.0      | 0.0                    | 0.0      | 0.0      | 0.0            | L                                  |
| <b>8</b>  | 0.0      | 0.0       | 99.3      | 0.0      | 0.7      | 0.0      | 0.0                    | 0.0      | 0.0      | 0.0            | L                                  |
| <b>40</b> | 0.0      | 0.0       | 99.1      | 0.0      | 0.0      | 0.0      | 0.0                    | 0.0      | 0.9      | 0.0            | M                                  |
| <b>32</b> | 0.0      | 0.5       | 99.5      | 0.0      | 0.0      | 0.0      | 0.0                    | 0.0      | 0.0      | 0.0            | M                                  |
| <b>37</b> | 0.0      | 0.0       | 100.0     | 0.0      | 0.0      | 0.0      | 0.0                    | 0.0      | 0.0      | 0.0            | M                                  |
| <b>38</b> | 0.0      | 4.1       | 95.9      | 0.0      | 0.0      | 0.0      | 0.0                    | 0.0      | 0.0      | 0.0            | L                                  |
| <b>35</b> | 0.0      | 0.0       | 100.0     | 0.0      | 0.0      | 0.0      | 0.0                    | 0.0      | 0.0      | 0.0            | H                                  |
| <b>16</b> | 0.0      | 0.0       | 100.0     | 0.0      | 0.0      | 0.0      | 0.0                    | 0.0      | 0.0      | 0.0            | H                                  |
| <b>36</b> | 2.9      | 0.0       | 0.0       | 0.0      | 81.6     | 2.2      | 0.0                    | 13.2     | 0.0      | 0.0            | H                                  |
| <b>4</b>  | 0.0      | 0.0       | 0.0       | 0.0      | 19.1     | 79.8     | 0.0                    | 0.0      | 0.0      | 1.1            | L                                  |
| <b>18</b> | 0.0      | 0.0       | 0.0       | 0.0      | 67.3     | 12.2     | 0.0                    | 20.4     | 0.0      | 0.0            | L                                  |
| <b>28</b> | 33.7     | 3.3       | 8.7       | 0.0      | 41.3     | 4.3      | 0.0                    | 7.6      | 0.0      | 1.1            | L                                  |
| <b>11</b> | 26.4     | 73.6      | 0.0       | 0.0      | 0.0      | 0.0      | 0.0                    | 0.0      | 0.0      | 0.0            | L                                  |
| <b>23</b> | 40.2     | 56.3      | 1.1       | 2.3      | 0.0      | 0.0      | 0.0                    | 0.0      | 0.0      | 0.0            | L                                  |
| <b>1</b>  | 27.3     | 67.7      | 0.0       | 1.9      | 1.2      | 0.6      | 0.0                    | 0.2      | 0.8      | 0.3            | L                                  |
| <b>22</b> | 17.9     | 79.2      | 0.0       | 1.0      | 0.8      | 0.3      | 0.0                    | 0.0      | 0.8      | 0.0            | L                                  |
| <b>9</b>  | 41.4     | 52.6      | 0.0       | 2.2      | 1.9      | 1.7      | 0.0                    | 0.1      | 0.0      | 0.1            | L                                  |
| <b>25</b> | 49.0     | 46.2      | 0.9       | 0.7      | 1.7      | 0.0      | 0.0                    | 1.1      | 0.2      | 0.2            | L                                  |
| <b>24</b> | 92.5     | 3.3       | 0.0       | 0.0      | 0.0      | 4.2      | 0.0                    | 0.0      | 0.0      | 0.0            | L                                  |
| <b>5</b>  | 0.0      | 0.0       | 0.0       | 0.0      | 0.0      | 100.0    | 0.0                    | 0.0      | 0.0      | 0.0            | H                                  |
| <b>13</b> | 5.3      | 0.0       | 7.9       | 0.0      | 68.4     | 0.0      | 0.0                    | 18.4     | 0.0      | 0.0            | H                                  |
| <b>14</b> | 0.7      | 0.7       | 2.8       | 0.0      | 72.2     | 0.7      | 0.0                    | 22.2     | 0.7      | 0.0            | H                                  |
| <b>17</b> | 8.6      | 0.0       | 0.0       | 0.0      | 91.4     | 0.0      | 0.0                    | 0.0      | 0.0      | 0.0            | H                                  |
| <b>3</b>  | 82.1     | 7.9       | 0.0       | 5.8      | 0.0      | 0.0      | 2.1                    | 0.0      | 0.0      | 2.1            | H                                  |
| <b>19</b> | 52.5     | 41.6      | 0.3       | 4.1      | 0.6      | 0.9      | 0.0                    | 0.0      | 0.0      | 0.0            | M                                  |
| <b>31</b> | 13.0     | 43.5      | 0.0       | 30.4     | 8.7      | 0.0      | 0.0                    | 4.3      | 0.0      | 0.0            | M                                  |

Values for phylogenetic group presented as percentages, VG column header describes the Virulence Group.

**Supplemental Table S5. Sequence Type Composition of Virulence Groups**

| VG | ST3580 | ST372 | ST127 | ST155<br>Cplx | ST95<br>Cplx | ST69<br>Cplx | ST12<br>Cplx | ST73<br>Cplx | ST23<br>Cplx | ST10<br>Cplx | ST117 | ST131<br>Cplx | ST38<br>Cplx | ST182 | ST-<br>Other* | Relative<br>Risk<br>Group |
|----|--------|-------|-------|---------------|--------------|--------------|--------------|--------------|--------------|--------------|-------|---------------|--------------|-------|---------------|---------------------------|
| 39 | 0.0    | 0.0   | 0.0   | 14.0          | 0.0          | 0.0          | 0.0          | 0.0          | 51.2         | 2.3          | 0.0   | 0.0           | 0.0          | 0.0   | 32.6          | L                         |
| 10 | 0.5    | 0.0   | 0.0   | 44.5          | 0.0          | 9.6          | 0.0          | 0.0          | 11.6         | 1.4          | 0.0   | 0.0           | 0.5          | 0.0   | 32.0          | L                         |
| 15 | 0.0    | 0.0   | 0.0   | 0.0           | 0.0          | 0.0          | 0.0          | 0.0          | 0.0          | 0.0          | 82.1  | 0.0           | 0.0          | 0.0   | 17.9          | L                         |
| 34 | 6.9    | 0.0   | 0.0   | 19.4          | 0.0          | 11.1         | 0.0          | 0.0          | 23.6         | 2.8          | 13.9  | 1.4           | 0.0          | 0.0   | 20.8          | L                         |
| 2  | 28.0   | 0.0   | 0.0   | 9.3           | 0.0          | 0.9          | 0.0          | 0.0          | 12.1         | 2.8          | 1.9   | 0.0           | 0.0          | 0.0   | 44.9          | L                         |
| 21 | 2.6    | 0.0   | 0.0   | 13.8          | 0.0          | 0.9          | 0.0          | 0.0          | 6.0          | 0.9          | 0.9   | 0.0           | 0.0          | 0.0   | 75.0          | L                         |
| 20 | 0.5    | 0.0   | 0.0   | 12.5          | 0.0          | 1.5          | 0.0          | 0.0          | 5.5          | 2.0          | 4.0   | 0.0           | 0.0          | 0.0   | 74.0          | L                         |
| 6  | 13.8   | 0.0   | 0.0   | 12.8          | 0.0          | 0.0          | 0.0          | 0.0          | 7.7          | 5.6          | 1.0   | 0.0           | 0.5          | 0.0   | 58.5          | L                         |
| 29 | 1.4    | 0.0   | 0.0   | 7.1           | 0.0          | 0.0          | 0.0          | 0.0          | 5.2          | 8.5          | 1.4   | 0.0           | 0.0          | 0.0   | 76.3          | L                         |
| 27 | 0.0    | 0.0   | 0.0   | 6.4           | 0.0          | 0.0          | 0.0          | 0.0          | 0.0          | 42.9         | 0.0   | 0.0           | 0.0          | 0.0   | 50.7          | L                         |
| 26 | 0.0    | 0.0   | 0.0   | 0.0           | 0.0          | 0.0          | 0.0          | 0.0          | 0.0          | 0.0          | 0.0   | 84.4          | 0.0          | 0.0   | 15.6          | H                         |
| 12 | 0.0    | 0.0   | 0.0   | 0.0           | 0.6          | 0.0          | 0.2          | 6.8          | 0.0          | 0.2          | 0.0   | 80.3          | 0.4          | 0.0   | 11.4          | H                         |
| 7  | 0.0    | 0.0   | 0.0   | 0.0           | 0.0          | 45.4         | 0.0          | 0.0          | 0.0          | 0.8          | 0.0   | 0.0           | 0.0          | 0.0   | 53.8          | H                         |
| 33 | 0.0    | 0.0   | 0.0   | 0.0           | 0.0          | 0.9          | 5.3          | 0.0          | 0.0          | 11.5         | 0.0   | 54.9          | 5.3          | 0.0   | 22.1          | H                         |
| 30 | 0.0    | 0.0   | 0.0   | 0.0           | 8.2          | 0.0          | 0.5          | 6.6          | 0.0          | 0.0          | 0.0   | 19.2          | 0.0          | 0.0   | 65.4          | L                         |
| 8  | 0.0    | 0.7   | 0.0   | 0.0           | 0.0          | 0.0          | 0.0          | 8.6          | 0.0          | 0.0          | 0.0   | 10.8          | 0.0          | 0.0   | 79.9          | L                         |
| 40 | 0.0    | 0.9   | 0.0   | 0.0           | 45.0         | 0.0          | 0.0          | 13.5         | 0.0          | 0.0          | 0.9   | 28.8          | 0.0          | 0.0   | 10.8          | M                         |
| 32 | 0.0    | 35.6  | 1.8   | 0.0           | 0.0          | 0.0          | 3.6          | 47.7         | 0.0          | 0.0          | 0.0   | 0.0           | 0.0          | 0.0   | 11.3          | M                         |
| 37 | 0.0    | 0.6   | 11.2  | 0.0           | 0.0          | 0.0          | 47.3         | 13.6         | 0.0          | 0.0          | 0.0   | 0.0           | 0.0          | 0.0   | 27.2          | M                         |
| 38 | 0.0    | 35.6  | 0.0   | 0.0           | 0.0          | 0.0          | 0.0          | 9.6          | 0.0          | 0.0          | 0.0   | 1.4           | 0.0          | 0.0   | 53.4          | L                         |
| 35 | 0.0    | 1.0   | 40.8  | 0.0           | 33.0         | 0.0          | 0.0          | 2.9          | 0.0          | 0.0          | 0.0   | 1.0           | 0.0          | 0.0   | 21.4          | H                         |
| 16 | 0.0    | 7.7   | 12.0  | 0.0           | 33.6         | 0.0          | 2.6          | 3.3          | 0.0          | 0.0          | 0.0   | 9.1           | 0.0          | 0.0   | 31.8          | H                         |
| 36 | 0.0    | 0.0   | 0.0   | 0.0           | 0.0          | 8.8          | 0.0          | 0.0          | 0.0          | 0.7          | 0.0   | 0.0           | 14.7         | 0.0   | 75.7          | H                         |
| 4  | 0.0    | 0.0   | 0.0   | 0.0           | 0.0          | 0.0          | 0.0          | 0.0          | 0.0          | 0.0          | 0.0   | 0.0           | 3.2          | 1.1   | 95.7          | L                         |
| 18 | 0.0    | 0.0   | 0.0   | 0.0           | 0.0          | 22.4         | 0.0          | 0.0          | 0.0          | 0.0          | 0.0   | 0.0           | 16.3         | 0.0   | 61.2          | L                         |
| 28 | 0.0    | 0.0   | 0.0   | 0.0           | 0.0          | 2.2          | 0.0          | 0.0          | 0.0          | 16.3         | 0.0   | 0.0           | 28.3         | 0.0   | 53.3          | L                         |
| 11 | 0.0    | 0.0   | 0.0   | 9.7           | 0.0          | 0.0          | 0.0          | 0.0          | 0.0          | 11.1         | 0.0   | 0.0           | 0.0          | 0.0   | 79.2          | L                         |
| 23 | 0.0    | 0.0   | 0.0   | 10.3          | 0.0          | 0.0          | 0.0          | 0.0          | 2.3          | 18.4         | 0.0   | 0.0           | 0.0          | 0.0   | 69.0          | L                         |
| 1  | 0.2    | 0.0   | 0.0   | 9.7           | 0.0          | 0.5          | 0.0          | 0.0          | 1.8          | 13.1         | 0.4   | 0.0           | 0.0          | 0.0   | 74.3          | L                         |
| 22 | 0.0    | 0.0   | 0.0   | 10.3          | 0.0          | 0.0          | 0.0          | 0.0          | 1.0          | 10.5         | 0.3   | 0.0           | 0.0          | 0.0   | 77.9          | L                         |
| 9  | 0.2    | 0.0   | 0.0   | 7.4           | 0.0          | 0.0          | 0.0          | 0.0          | 2.1          | 8.3          | 0.0   | 0.0           | 0.1          | 0.0   | 81.9          | L                         |
| 25 | 0.0    | 0.0   | 0.0   | 6.1           | 0.0          | 0.2          | 0.0          | 0.0          | 0.7          | 17.9         | 0.0   | 0.0           | 0.2          | 0.0   | 74.9          | L                         |
| 24 | 0.0    | 0.0   | 0.0   | 0.0           | 0.0          | 0.0          | 0.0          | 0.0          | 0.0          | 32.1         | 0.0   | 0.0           | 0.0          | 0.0   | 67.9          | L                         |
| 5  | 0.0    | 0.0   | 0.0   | 0.0           | 0.0          | 0.0          | 0.0          | 0.0          | 0.0          | 0.0          | 0.0   | 0.0           | 0.0          | 89.5  | 10.5          | H                         |
| 13 | 0.0    | 0.0   | 0.0   | 0.0           | 0.0          | 7.9          | 0.0          | 0.0          | 0.0          | 2.6          | 0.0   | 0.0           | 31.6         | 0.0   | 57.9          | H                         |
| 14 | 0.0    | 0.0   | 0.0   | 0.0           | 0.0          | 16.0         | 0.0          | 0.0          | 0.0          | 0.0          | 0.0   | 0.7           | 16.0         | 0.0   | 67.4          | H                         |
| 17 | 0.0    | 0.0   | 0.0   | 0.0           | 0.0          | 5.7          | 0.0          | 0.0          | 0.0          | 5.7          | 0.0   | 0.0           | 85.7         | 0.0   | 2.9           | H                         |
| 3  | 0.0    | 0.0   | 0.0   | 0.0           | 0.0          | 0.0          | 0.0          | 0.0          | 6.3          | 68.9         | 0.0   | 0.0           | 0.0          | 0.0   | 24.7          | H                         |
| 19 | 0.0    | 0.0   | 0.0   | 6.6           | 0.0          | 0.0          | 0.0          | 0.0          | 3.4          | 28.1         | 0.0   | 0.3           | 0.6          | 0.0   | 60.9          | M                         |
| 31 | 0.0    | 0.0   | 0.0   | 21.7          | 0.0          | 8.7          | 0.0          | 0.0          | 26.1         | 4.3          | 0.0   | 0.0           | 0.0          | 0.0   | 39.1          | M                         |

\*Sequence types not present at greater than a 25% threshold in any of the 40 virulence groups were combined into the ST-Other group. Values for sequence type presented as percentages. VG column header describes the Virulence Group.
