# Supplementary material for: Use of Large-Scale Genomics to Identify the Role of Animals and Foods as Potential Sources of Extraintestinal Pathogenic Escherichia coli That Cause Human Illness
Source: MDPI journal article supplement (doi:10.3390/foods11131975), 2022-07-03
Supplement: s1 [file s1]

# Sequence Type Subdivisions of non-IPEC Virulence Groups Containing ≥ 5 Isolates from Humans

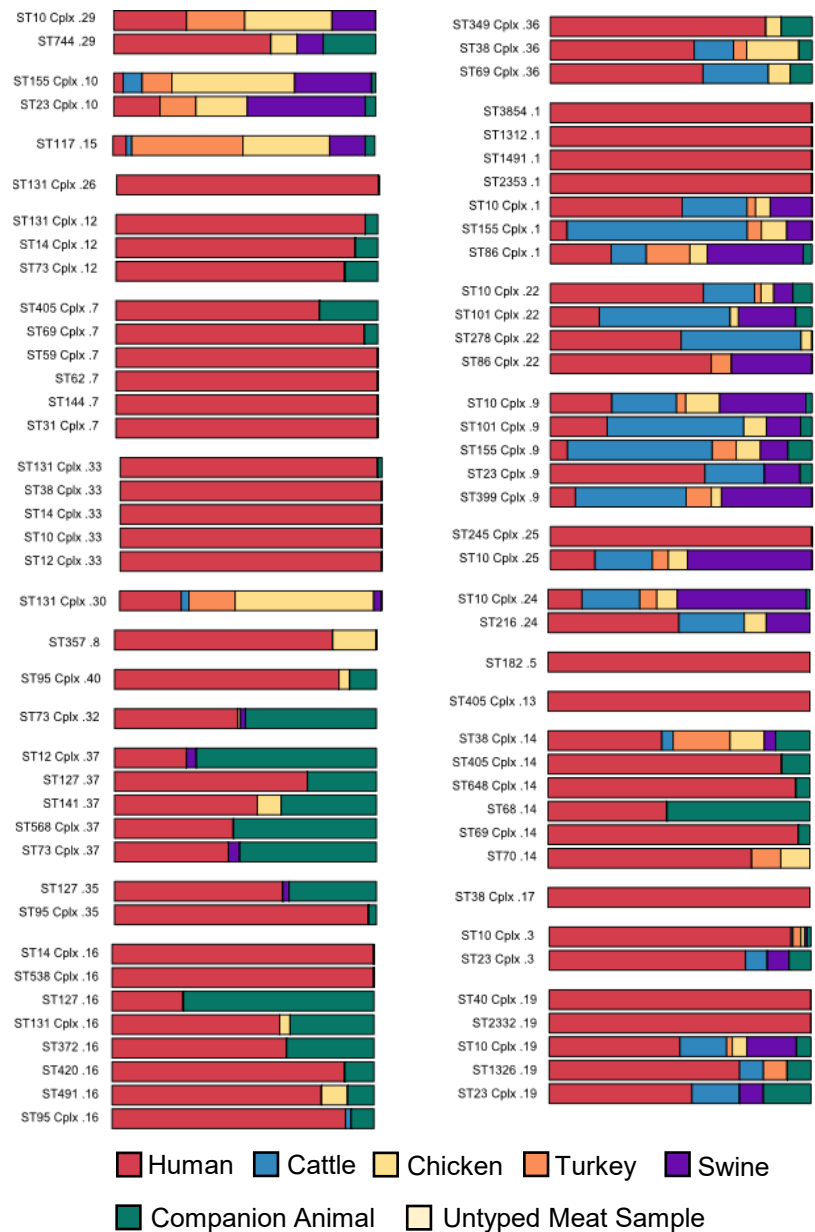

**Supplemental Figure S1.** A comparison of sequence type/ virulence group combinations shows how the human proportion of isolates from a given sequence type differs by virulence group. Label format is ST followed by virulence group (e.g. ST10 Cplx .29 is the ST10 Cplx from virulence group 29)

# Composition of Virulence Groups by Phylotype, Organization, Isolation Source and Sequence Type

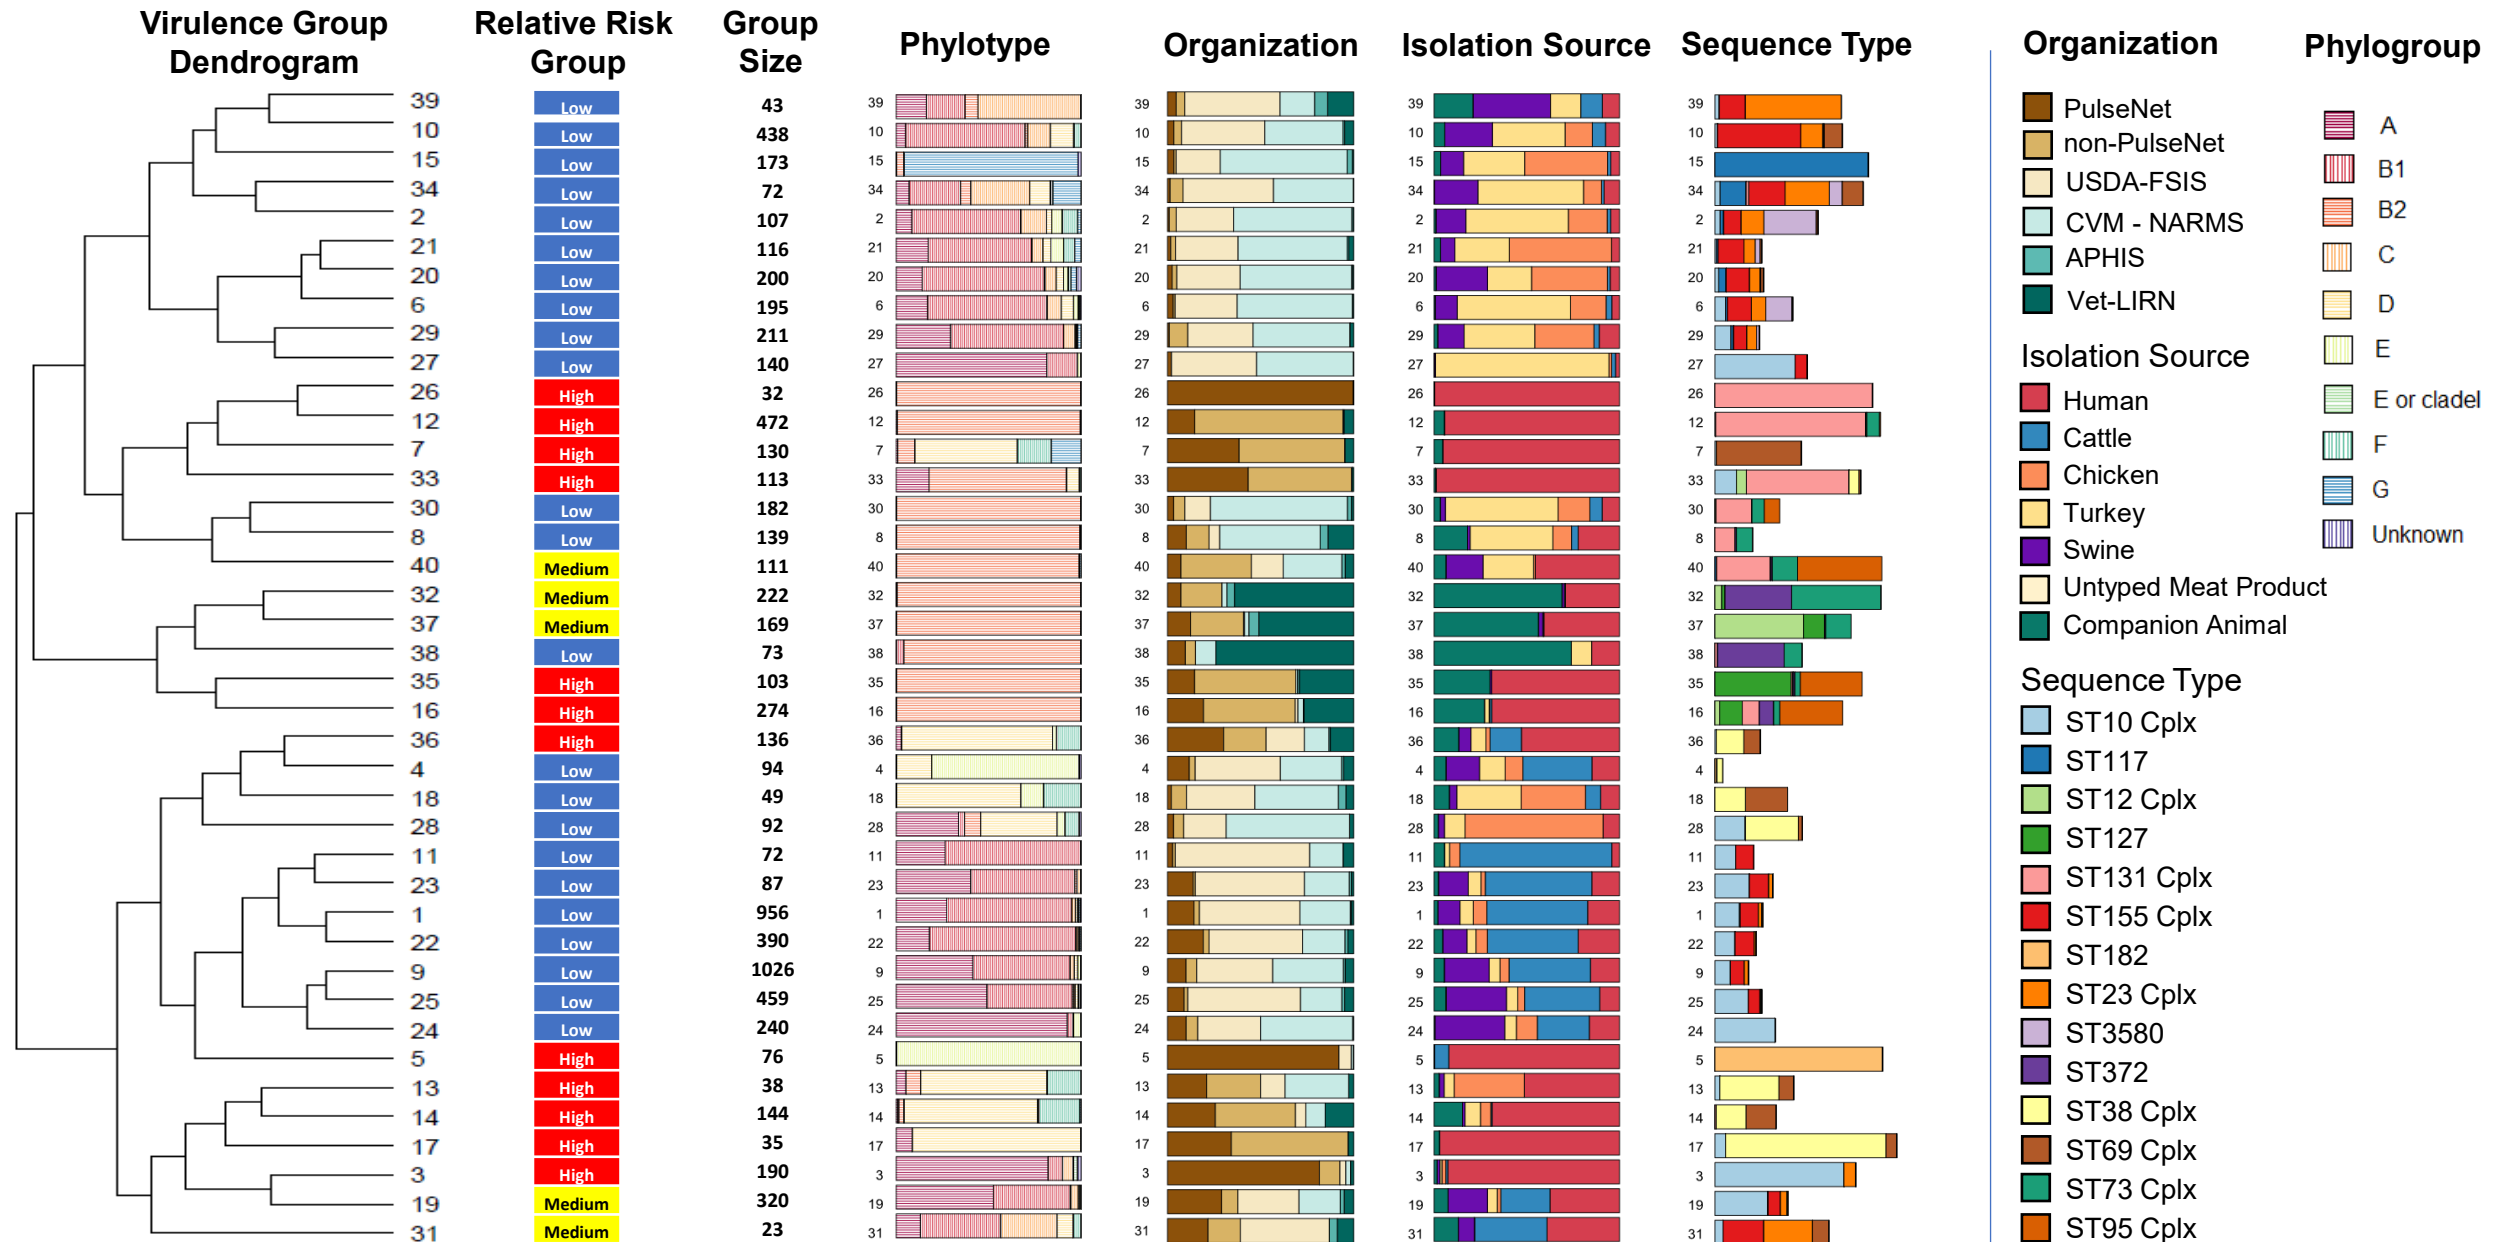

**Supplemental Figure S2.** An overview of virulence groups organized by: virulence gene profile dendrogram; relative risk group and size; and composition by phylogenetic group, contributing organization, isolation source and sequence type. Corresponding data can be found in Supplemental Tables 1-5. Animal isolation sources are the combined results from all contributing organizations
